# Supplementary material for: Edge sites enriched vanadium doped MoS2/RGO composites as highly selective room temperature ammonia gas sensors with ppb level detection
Source: Royal Society of Chemistry journal article supplement (doi:10.1039/d3tc02192k), 2023-01-01
Supplement: d3tc02192k1.pdf [file d3tc02192k1.pdf]

## Supplementary Information

# Edge sites enriched vanadium doped MoS<sub>2</sub>/RGO composites as highly selective room temperature ammonia gas sensor with ppb level detection

Linto Sibi S P<sup>a</sup>, Rajkumar M<sup>a\*</sup>, Kamaraj Govindharaj<sup>b</sup>, Mobika J<sup>c</sup>, Nithya Priya V<sup>a</sup>,  
RT Rajendra Kumar<sup>b</sup>

<sup>a</sup>Department of Physics, PSG College of Arts and Science, Coimbatore 641014, Tamil Nadu, India.

<sup>b</sup>Advanced Materials and Devices Laboratory (AMDL), Department of Nanoscience and Technology, Bharathiar University, Coimbatore 641046, Tamil Nadu, India

<sup>c</sup>Department of Physics, Nandha Engineering College, Erode, Tamil Nadu - 638052, India.

\*Corresponding author: [vmanirajkumar@gmail.com](mailto:vmanirajkumar@gmail.com)

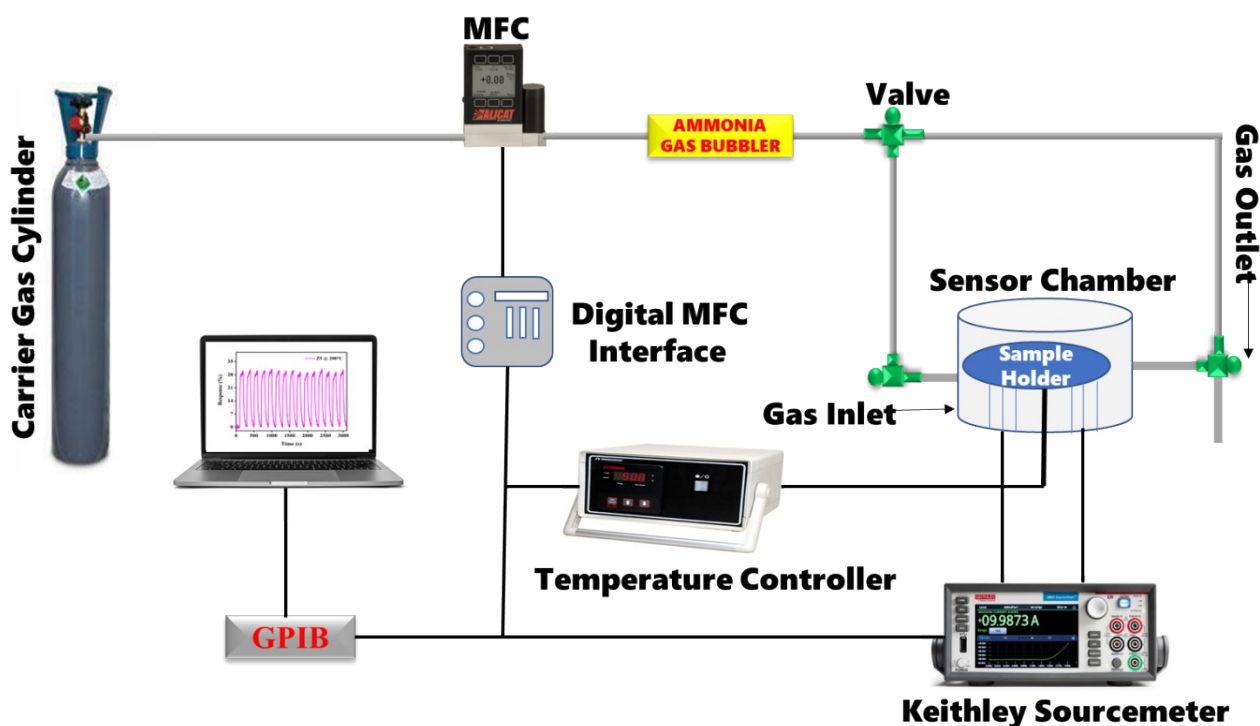

Figure S1. Schematic illustration of the gas sensing setup employed for ammonia gas sensing.

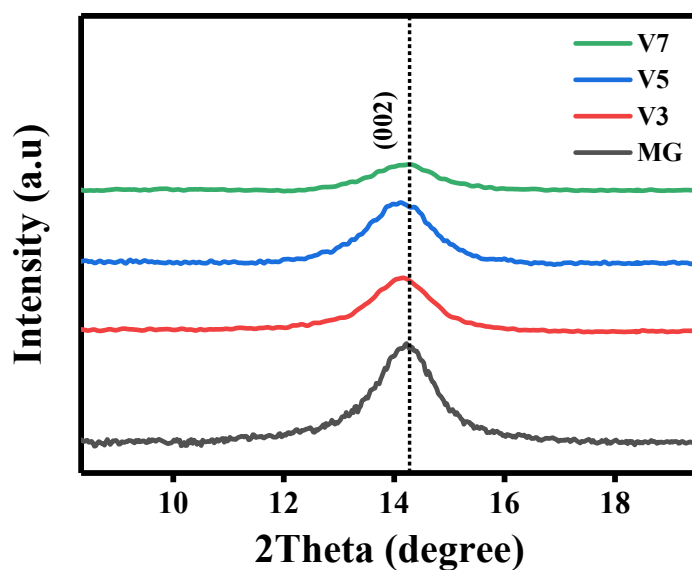

Figure S2. Magnified view of the (002) plane in the XRD pattern of MG, V3, V5 and V7 composites.

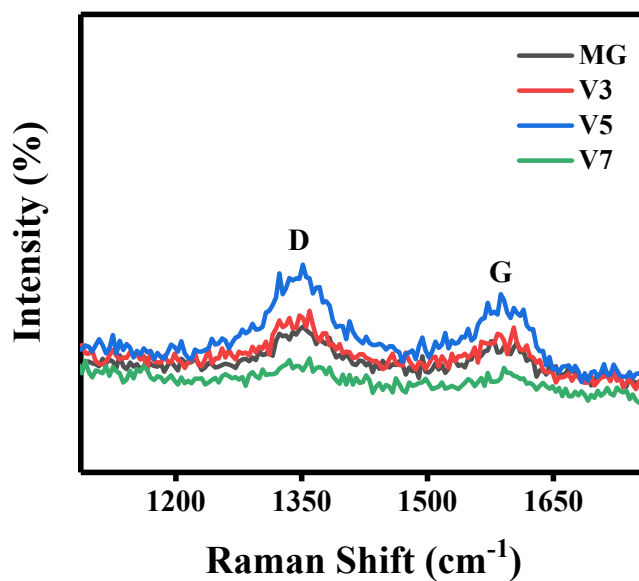

Figure S3. Enlarged view of the D and G bands in the Raman spectra of vanadium doped and undoped MoS<sub>2</sub>/RGO composites.

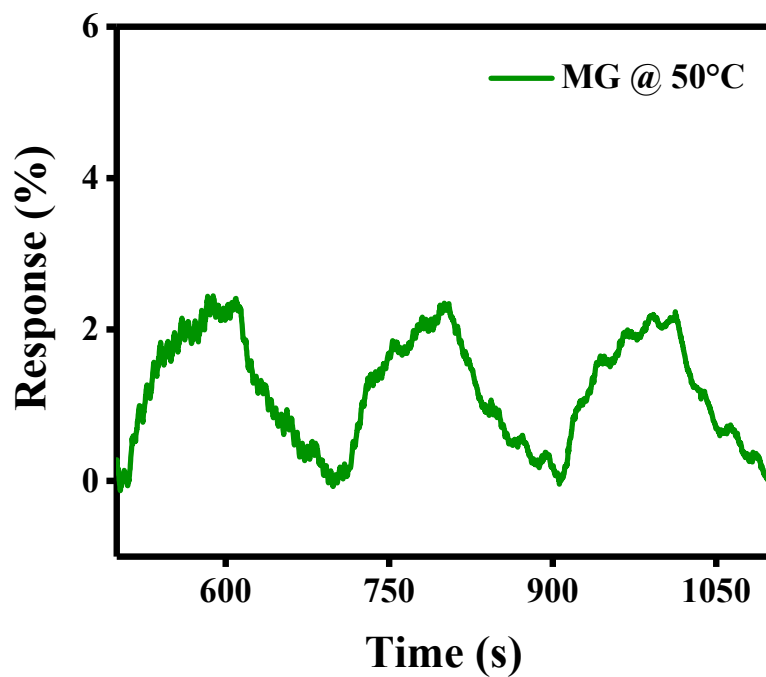

Figure S4. Response curve of pristine MG to 50 ppm of ammonia at 50°C

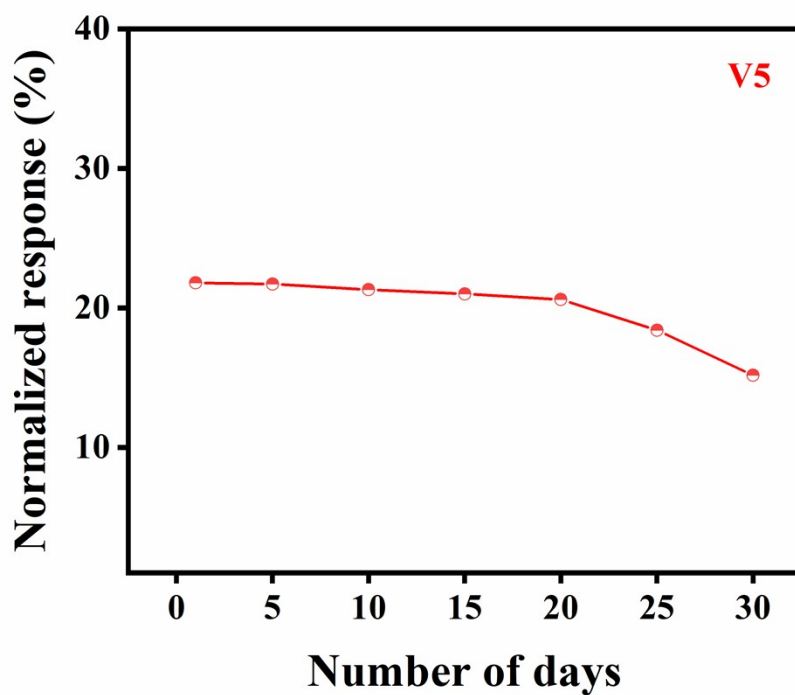

Figure S5. Long term stability of V5 towards 50 ppm of ammonia at room temperature
